# Supplementary material
Source: HighWire-hosted journal article supplement (http://www.annfammed.org/highwire/filestream/8748/field_highwire_adjunct_files/0/SharmaSupp_tables_1-4.pdf)
Supplement: SharmaSupp_tables_1-4.pdf [file SharmaSupp_tables_1-4.pdf]

**Supplemental materials for:**

Sharma AE, Willard-Grace R, Hessler D, Bodenheimer T, Thom DH. What Happens After Health Coaching? Observational Study 1 Year Following a Randomized Controlled Trial. *Ann Fam Med*. 2016;14(2):200-207.

| <b>Supplemental Table 1. Baseline Characteristics of RCT Health Coaching patients.</b> |                               |                                                                                                    |                                                                                            |
|----------------------------------------------------------------------------------------|-------------------------------|----------------------------------------------------------------------------------------------------|--------------------------------------------------------------------------------------------|
| <b>Characteristic</b>                                                                  | <b>Enrollment<br/>(n=224)</b> | <b>24 month follow-up with<br/>clinical measures available at<br/>12 and 24 months<br/>(n=157)</b> | <b>Patients without clinical<br/>measures available at 12<br/>and 24 months<br/>(n=67)</b> |
| Age, mean (SD), y                                                                      | 52.6 (10.7)                   | 53.7 (10.2)                                                                                        | 50.1 (11.3)                                                                                |
| Gender (female), % (No.)                                                               | 58.5 (117)                    | 51.6 (81)                                                                                          | 53.7 (36)                                                                                  |
| Married/long term relationship,<br>% (No.)                                             | 49.1 (110)                    | 47.1 (74)                                                                                          | 53.7 (36)                                                                                  |
| Born in the US, % (No.)                                                                | 26.3 (59)                     | 27.4 (43)                                                                                          | 23.9 (16)                                                                                  |
| Years in US, mean (SD)*                                                                | 10.4 (18.5)                   | 19.6 (10.3)                                                                                        | 17 (9.8)                                                                                   |
| <b>Primary Language, % (No.)</b>                                                       |                               |                                                                                                    |                                                                                            |
| English                                                                                | 28.6 (64)                     | 29.3 (46)                                                                                          | 26.9 (18)                                                                                  |
| Spanish                                                                                | 67.9 (152)                    | 67.5 (106)                                                                                         | 68.7 (46)                                                                                  |
| Other                                                                                  | 3.6 (8)                       | 3.2 (5)                                                                                            | 4.5 (3)                                                                                    |
| <b>Race/Ethnicity, % (No.)</b>                                                         |                               |                                                                                                    |                                                                                            |
| Asian/Pacific Islander                                                                 | 3.1 (7)                       | 2.6 (4)                                                                                            | 4.5 (3)                                                                                    |
| African American                                                                       | 19.6 (44)                     | 20.4 (32)                                                                                          | 17.9 (12)                                                                                  |
| Latino or Hispanic                                                                     | 69.2 (155)                    | 68.2 (107)                                                                                         | 71.6 (48)                                                                                  |
| White                                                                                  | 2.7 (6)                       | 2.6 (4)                                                                                            | 3.0 (2)                                                                                    |
| Other                                                                                  | 5.4 (12)                      | 6.4 (10)                                                                                           | 3.0 (2)                                                                                    |
| <b>Working status, % (No.)</b>                                                         |                               |                                                                                                    |                                                                                            |
| Employed full time                                                                     | 21.0 (47)                     | 19.1 (30)                                                                                          | 25.4 (17)                                                                                  |
| Employed part time                                                                     | 25.0 (56)                     | 27.4 (43)                                                                                          | 19.4 (13)                                                                                  |
| Homemaker                                                                              | 10.7 (24)                     | 10.8 (17)                                                                                          | 10.5 (7)                                                                                   |
| Unemployed                                                                             | 16.1 (36)                     | 12.7 (20)                                                                                          | 23.9 (16)                                                                                  |
| Retired/Disabled / SSI/other                                                           | 27.2 (61)                     | 29.9 (47)                                                                                          | 20.9 (14)                                                                                  |
| <b>Education, % (No.)</b>                                                              |                               |                                                                                                    |                                                                                            |
| ≤ 5 <sup>th</sup> grade                                                                | 22.3 (50)                     | 20.4 (32)                                                                                          | 26.9 (18)                                                                                  |
| 6th to 8th grade                                                                       | 21.4 (48)                     | 22.3 (35)                                                                                          | 19.4 (13)                                                                                  |
| Some high school                                                                       | 14.3 (32)                     | 14.0 (22)                                                                                          | 14.9 (10)                                                                                  |
| High school grad or GED                                                                | 18.8 (42)                     | 19.8 (31)                                                                                          | 16.4 (11)                                                                                  |
| Some college                                                                           | 12.1 (27)                     | 12.7 (20)                                                                                          | 10.5 (7)                                                                                   |
| College graduate                                                                       | 11.2 (25)                     | 10.9 (17)                                                                                          | 11.9 (8)                                                                                   |
| <b>Income, % (No.)</b>                                                                 |                               |                                                                                                    |                                                                                            |
| Less than 5K                                                                           | 36.6 (82)                     | 35.7 (56)                                                                                          | 38.8 (26)                                                                                  |
| 5K-10K                                                                                 | 23.2 (52)                     | 23.6 (37)                                                                                          | 22.4 (15)                                                                                  |
| 10-20K                                                                                 | 29.9 (67)                     | 33.8 (53)                                                                                          | 20.9 (14)                                                                                  |
| More than 20K                                                                          | 10.2 (23)                     | 7.0 (11)                                                                                           | 17.9 (12)                                                                                  |
| Number of PCP visits in year<br>prior to enrollment, mean (SD)                         | 5.4 (4.1)                     | 5.3 (3.6)                                                                                          | 4.6 (3.6)                                                                                  |
| <b>Measures at baseline, mean<br/>(SD)</b>                                             |                               |                                                                                                    |                                                                                            |
| BMI, kg/m <sup>2</sup>                                                                 | 31.5 (7.0)                    | 31.8 (6.2)                                                                                         | 31.6 (8.3)                                                                                 |
| A1c, (%)†                                                                              | 9.8 (1.5)                     | 9.6 (1.4)                                                                                          | 10.6 (1.8)                                                                                 |
| LDL, (mg/dL)†                                                                          | 146.3 (36.9)                  | 142.6 (32.3)                                                                                       | 153.5 (43.5)                                                                               |
| SBP, (mmHg)†                                                                           | 157.7 (13.5)                  | 158.3 (14.2)                                                                                       | 154.5 (11.7)                                                                               |

This supplemental material has been supplied by the author and has not been edited by  
*Annals of Family Medicine.*

| <b>Supplemental Table 2. Baseline Characteristics of RCT Usual Care patients.</b> |                                  |                                                                                                        |                                                                                            |
|-----------------------------------------------------------------------------------|----------------------------------|--------------------------------------------------------------------------------------------------------|--------------------------------------------------------------------------------------------|
| <b>Characteristic</b>                                                             | <b>At enrollment<br/>(n=217)</b> | <b>24 month follow-up<br/>with clinical measures<br/>available at 12 and 24<br/>months<br/>(n=133)</b> | <b>Patients without<br/>clinical measures<br/>available at 12 and 24<br/>months (n=84)</b> |
| Age, mean (SD), y                                                                 | 52.9 (11.5)                      | 54.2 (11.8)                                                                                            | 53.2 (11.6)                                                                                |
| Gender (female), %<br>(No.)                                                       | 56.6 (123)                       | 62.4 (83)                                                                                              | 47.6 (40)                                                                                  |
| Married/long term<br>relationship, % (No.)                                        | 57.1 (124)                       | 51.1 (76)                                                                                              | 57.1 (48)                                                                                  |
| Born in the US, % (No.)                                                           | 24.9 (54)                        | 25.6 (34)                                                                                              | 23.8 (20)                                                                                  |
| Years in US, mean (SD)*                                                           | 17.9 (11.9)                      | 17.4 (11.6)                                                                                            | 18.3 (11.8)                                                                                |
| <b>Primary Language, %<br/>(No.)</b>                                              |                                  |                                                                                                        |                                                                                            |
| English                                                                           | 26.7 (58)                        | 27.1 (36)                                                                                              | 26.2 (22)                                                                                  |
| Spanish                                                                           | 69.5 (151)                       | 70.7 (94)                                                                                              | 67.9 (57)                                                                                  |
| Other                                                                             | 3.7 (8)                          | 2.3 (3)                                                                                                | 6.0 (5)                                                                                    |
| <b>Race/Ethnicity, % (No.)</b>                                                    |                                  |                                                                                                        |                                                                                            |
| Asian/Pacific Islander                                                            | 5.1 (11)                         | 4.5 (6)                                                                                                | 6.0 (5)                                                                                    |
| African American                                                                  | 18.4 (40)                        | 19.6 (26)                                                                                              | 16.7 (14)                                                                                  |
| Latino or Hispanic                                                                | 71.0 (154)                       | 71.4 (95)                                                                                              | 70.2 (59)                                                                                  |
| White                                                                             | 2.3 (5)                          | 3.0 (4)                                                                                                | 1.2 (1)                                                                                    |
| Other                                                                             | 3.2 (7)                          | 1.5 (2)                                                                                                | 6.0 (5)                                                                                    |
| <b>Working status, % (No.)</b>                                                    |                                  |                                                                                                        |                                                                                            |
| Employed full time                                                                | 16.1 (35)                        | 17.3 (23)                                                                                              | 14.3 (12)                                                                                  |
| Employed part time                                                                | 26.3 (57)                        | 28.6 (38)                                                                                              | 22.6 (19)                                                                                  |
| Homemaker                                                                         | 17.1 (37)                        | 16.5 (22)                                                                                              | 17.9 (15)                                                                                  |
| Unemployed                                                                        | 16.1 (35)                        | 16.5 (22)                                                                                              | 15.5 (13)                                                                                  |
| Retired/Disabled /<br>SSI/other                                                   | 25.9 (114)                       | 28 (21.1)                                                                                              | 25 (29.8)                                                                                  |
| <b>Education, % (No.)</b>                                                         |                                  |                                                                                                        |                                                                                            |
| ≤ 5 <sup>th</sup> grade                                                           | 23.1 (50)                        | 26.3 (35)                                                                                              | 17.9 (15)                                                                                  |
| 6th to 8th grade                                                                  | 20.7 (45)                        | 19.6 (26)                                                                                              | 22.6 (19)                                                                                  |
| Some high school                                                                  | 12.4 (27)                        | 12.0 (16)                                                                                              | 13.1 (11)                                                                                  |
| High school grad or<br>GED                                                        | 16.6 (36)                        | 13.5 (18)                                                                                              | 21.4 (18)                                                                                  |
| Some college                                                                      | 19.4 (42)                        | 19.6 (26)                                                                                              | 19.1 (16)                                                                                  |
| College graduate                                                                  | 7.8 (17)                         | 9.0 (12)                                                                                               | 6.0 (5)                                                                                    |
| <b>Income, % (No.)</b>                                                            |                                  |                                                                                                        |                                                                                            |
| Less than 5K                                                                      | 31.3 (68)                        | 30.8 (41)                                                                                              | 32.1 (27)                                                                                  |
| 5K-10K                                                                            | 25.3 (55)                        | 21.8 (29)                                                                                              | 31.0 (26)                                                                                  |
| 10-20K                                                                            | 29.0 (63)                        | 33.1 (44)                                                                                              | 22.6 (19)                                                                                  |
| More than 20K                                                                     | 14.2 (31)                        | 14.3 (19)                                                                                              | 14.3 (12)                                                                                  |
| Number of PCP visits in<br>year prior to<br>enrollment, mean (SD)                 | 5.4 (3.9)                        | 5.2 (4.2)                                                                                              | 4.8 (3.2)                                                                                  |
| <b>Measures at baseline,<br/>mean (SD)</b>                                        |                                  |                                                                                                        |                                                                                            |

This supplemental material has been supplied by the author and has not been edited by  
*Annals of Family Medicine.*

|                        |              |              |              |
|------------------------|--------------|--------------|--------------|
| BMI, kg/m <sup>2</sup> | 31.4 (6.7)   | 31.7 (5.7)   | 30.6 (8.2)   |
| A1c, (%)†              | 9.9 (1.5)    | 10.0 (1.5)   | 9.9 (1.2)    |
| LDL, (mg/dL)†          | 147.0 (35.6) | 143.9 (32.5) | 154.6 (34.6) |
| SBP, (mmHg)†           | 159.4 (15.4) | 160.4 (16.6) | 159.9 (16.0) |

This supplemental material has been supplied by the author and has not been edited by  
*Annals of Family Medicine.*

| <b>Supplemental Table 3. Baseline Characteristics of Patients, RCT Health Coaching Arm Patients and Usual Care Subgroups.</b> |                                        |                                                    |                                                 |
|-------------------------------------------------------------------------------------------------------------------------------|----------------------------------------|----------------------------------------------------|-------------------------------------------------|
| <b>Characteristic</b>                                                                                                         | <b>RCT health coaching arm (n=157)</b> | <b>RCT usual care arm, coached post-RCT (n=48)</b> | <b>RCT usual care arm, never coached (n=85)</b> |
| Age, mean (SD), y                                                                                                             | 53.7 (10.2)                            | 52.1 (11.3)                                        | 52.7 (11.7)                                     |
| Gender (female), % (No.)                                                                                                      | 51.6 (81)                              | 56.3 (27)                                          | 34.1 (29)                                       |
| Married/long term relationship, % (No.)                                                                                       | 47.1 (74)                              | 62.5 (30)                                          | 54.1 (46)                                       |
| Born in the US, % (No.)                                                                                                       | 27.4 (43)                              | 14.6 (7)                                           | 31.8 (27)                                       |
| Years in US, mean (SD)*                                                                                                       | 19.6 (10.3)                            | 16.0 (10.6)                                        | 18.4 (12.3)                                     |
| <b>Primary Language, % (No.)</b>                                                                                              |                                        |                                                    |                                                 |
| English                                                                                                                       | 29.3 (46)                              | 14.6 (7)                                           | 34.1 (29)                                       |
| Spanish                                                                                                                       | 67.5 (106)                             | 83.3 (40)                                          | 63.5 (54)                                       |
| Other                                                                                                                         | 3.2 (5)                                | 2.1 (1)                                            | 2.4 (2)                                         |
| <b>Race/Ethnicity, % (No.)</b>                                                                                                |                                        |                                                    |                                                 |
| Asian/Pacific Islander                                                                                                        | 2.6 (4)                                | 4.2 (2)                                            | 4.7 (4)                                         |
| African American                                                                                                              | 20.4 (32)                              | 10.4 (5)                                           | 24.7 (21)                                       |
| Latino or Hispanic                                                                                                            | 68.2 (107)                             | 83.3 (40)                                          | 64.7 (55)                                       |
| White                                                                                                                         | 2.6 (4)                                | 0                                                  | 4.7 (4)                                         |
| Other                                                                                                                         | 6.4 (10)                               | 2.1 (1)                                            | 1.2 (1)                                         |
| <b>Working status, % (No.)</b>                                                                                                |                                        |                                                    |                                                 |
| Employed full time                                                                                                            | 19.1 (30)                              | 22.9 (11)                                          | 14.1 (12)                                       |
| Employed part time                                                                                                            | 27.4 (43)                              | 22.9 (11)                                          | 31.8 (27)                                       |
| Homemaker                                                                                                                     | 10.8 (17)                              | 12.5 (6)                                           | 18.8 (16)                                       |
| Unemployed                                                                                                                    | 12.7 (20)                              | 10.4 (5)                                           | 20.0 (17)                                       |
| Retired/Disabled / SSI/other                                                                                                  | 29.9 (47)                              | 33.3 (16)                                          | 15.3 (13)                                       |
| <b>Education, % (No.)</b>                                                                                                     |                                        |                                                    |                                                 |
| ≤ 5 <sup>th</sup> grade                                                                                                       | 20.4 (32)                              | 29.2 (14)                                          | 24.7 (21)                                       |
| 6th to 8th grade                                                                                                              | 22.3 (35)                              | 25.0 (12)                                          | 16.5 (14)                                       |
| Some high school                                                                                                              | 14.0 (22)                              | 16.7 (8)                                           | 9.4 (8)                                         |
| High school grad or GED                                                                                                       | 19.8 (31)                              | 6.3 (3)                                            | 17.7 (15)                                       |
| Some college                                                                                                                  | 12.7 (20)                              | 12.5 (6)                                           | 23.5 (20)                                       |
| College graduate                                                                                                              | 10.8 (17)                              | 10.4 (5)                                           | 8.2 (7)                                         |
| <b>Income, % (No.)</b>                                                                                                        |                                        |                                                    |                                                 |
| Less than 5K                                                                                                                  | 35.7 (56)                              | 37.5 (18)                                          | 27.1 (23)                                       |
| 5K-10K                                                                                                                        | 23.6 (37)                              | 20.8 (10)                                          | 22.4 (19)                                       |
| 10-20K                                                                                                                        | 33.8 (53)                              | 31.3 (15)                                          | 34.1 (29)                                       |
| More than 20K                                                                                                                 | 7.0 (11)                               | 10.4 (5)                                           | 16.5 (14)                                       |
| Number of PCP visits in year prior to enrollment, mean (SD)                                                                   | 5.3 (3.6)                              | 4.7 (2.8)                                          | 5.5 (4.8)                                       |

This supplemental material has been supplied by the author and has not been edited by *Annals of Family Medicine.*

| <b>Measures at baseline,<br/>mean (SD)</b> |              |              |              |
|--------------------------------------------|--------------|--------------|--------------|
| BMI, kg/m <sup>2</sup>                     | 31.8 (6.2)   | 32.0 (6.1)   | 31.5 (5.5)   |
| A1c, (%) <sup>†</sup>                      | 9.6 (1.4)    | 10.3 (1.4)   | 9.6 (1.5)    |
| LDL, (mg/dL) <sup>†</sup>                  | 142.6 (32.3) | 135.1 (35.1) | 148.9 (30.2) |
| SBP, (mmHg) <sup>†</sup>                   | 158.3 (14.2) | 162.8 (14.5) | 159.6 (17.3) |

This supplemental material has been supplied by the author and has not been edited by  
*Annals of Family Medicine.*

| <b>Supplemental Table 4. Baseline Characteristics Of Patients Without Both 12 Month and 24 Month Clinical Data.</b> |                                    |                                      |                |
|---------------------------------------------------------------------------------------------------------------------|------------------------------------|--------------------------------------|----------------|
| <b>Characteristic</b>                                                                                               | <b>RCT Coaching arm<br/>(n=67)</b> | <b>RCT Usual Care arm<br/>(n=84)</b> | <b>p-value</b> |
| Age, mean (SD), y                                                                                                   | 50.1 (11.3)                        | 53.2 (11.6)                          | 0.11           |
| Gender (female), % (No.)                                                                                            | 53.7 (36)                          | 47.6 (40)                            | 0.87           |
| Married/long term relationship, % (No.)                                                                             | 53.7 (36)                          | 57.1 (48)                            | 0.66           |
| Born in the US, % (No.)                                                                                             | 23.9 (16)                          | 23.8 (20)                            | 0.99           |
| Years in US, mean (SD)*                                                                                             | 17 (9.8)                           | 18.3 (11.8)                          | 0.59           |
| <b>Primary Language, % (No.)</b>                                                                                    |                                    |                                      |                |
| English                                                                                                             | 26.9 (18)                          | 26.2 (22)                            | 0.92           |
| Spanish                                                                                                             | 68.7 (46)                          | 67.9 (57)                            |                |
| Other                                                                                                               | 4.5 (3)                            | 6.0 (5)                              |                |
| <b>Race/Ethnicity, % (No.)</b>                                                                                      |                                    |                                      |                |
| Asian/Pacific Islander                                                                                              | 4.5 (3)                            | 6.0 (5)                              | 0.83           |
| African American                                                                                                    | 17.9 (12)                          | 16.7 (14)                            |                |
| Latino or Hispanic                                                                                                  | 87.6 (48)                          | 70.2 (59)                            |                |
| White                                                                                                               | 3.0 (2)                            | 1.2 (1)                              |                |
| Other                                                                                                               | 3.0 (2)                            | 6.0 (5)                              |                |
| <b>Working status, % (No.)</b>                                                                                      |                                    |                                      |                |
| Employed full time                                                                                                  | 25.4 (17)                          | 14.3 (12)                            | 0.21           |
| Employed part time                                                                                                  | 19.4 (13)                          | 22.6 (19)                            |                |
| Homemaker                                                                                                           | 10.5 (7)                           | 17.9 (15)                            |                |
| Unemployed                                                                                                          | 23.9 (16)                          | 15.5 (13)                            |                |
| Retired/Disabled / SSI/other                                                                                        | 20.9 (14)                          | 25 (29.8)                            |                |
| <b>Education, % (No.)</b>                                                                                           |                                    |                                      |                |
| ≤ 5 <sup>th</sup> grade                                                                                             | 26.9 (18)                          | 17.9 (15)                            | 0.48           |
| 6th to 8th grade                                                                                                    | 19.4 (13)                          | 22.6 (19)                            |                |
| Some high school                                                                                                    | 14.9 (10)                          | 13.1 (11)                            |                |
| High school grad or GED                                                                                             | 16.4 (11)                          | 21.4 (18)                            |                |
| Some college                                                                                                        | 10.5 (7)                           | 19.1 (16)                            |                |
| College graduate                                                                                                    | 11.9 (8)                           | 6.0 (5)                              |                |
| <b>Income, % (No.)</b>                                                                                              |                                    |                                      |                |
| Less than 5K                                                                                                        | 38.8 (26)                          | 32.1 (27)                            | 0.77           |
| 5K-10K                                                                                                              | 22.4 (15)                          | 31.0 (26)                            |                |
| 10-20K                                                                                                              | 20.9 (14)                          | 22.6 (19)                            |                |
| More than 20K                                                                                                       | 17.9 (12)                          | 14.3 (12)                            |                |
| Number of PCP visits in year prior to enrollment, mean (SD)                                                         | 4.6 (3.6)                          | 4.8 (3.2)                            | 0.68           |
| <b>Measures at baseline, mean (SD)</b>                                                                              |                                    |                                      |                |
| BMI, kg/m <sup>2</sup>                                                                                              | 31.6 (8.3)                         | 30.6 (8.2)                           | 0.55           |
| A1c, (%)†                                                                                                           | 10.6 (1.8)                         | 9.9 (1.2)                            | 0.16           |
| LDL, (mg/dL)†                                                                                                       | 153.5 (43.5)                       | 154.6 (34.6)                         | 0.92           |
| SBP, (mmHg)†                                                                                                        | 154.5 (11.7)                       | 159.9 (16.0)                         | 0.27           |

This supplemental material has been supplied by the author and has not been edited by  
*Annals of Family Medicine.*
